# Supplementary material for: Systemic Complement Activation in Age-Related Macular Degeneration
Source: PLOS journal article supplement (doi:10.1371/journal.pone.0002593), 2008-07-01
Supplement: S1 (10.1371/journal.pone.0002593.s001) [file journal.pone.0002593.s001]

| SUPPL.<br>TABLE 1.<br>GENOTYPES<br>Marker | Designation<br>(Gene) | Allele 1 | Allele 2 | Genotypes Cases |             |             |       | MAF *       | Genotypes Controls |             |       |        | ATT **<br>P value |
|-------------------------------------------|-----------------------|----------|----------|-----------------|-------------|-------------|-------|-------------|--------------------|-------------|-------|--------|-------------------|
|                                           |                       |          |          | 11              | 12          | 22          |       |             | 11                 | 12          | 22    | MAF*   |                   |
| <b>CFH gene</b>                           |                       |          |          |                 |             |             |       |             |                    |             |       |        |                   |
| rs800292                                  | I62V (CFH)            | G        | A        | 84<br>75.0%     | 27<br>24.1% | 1<br>8.9%   | 12.9% | 38<br>56.7% | 27<br>40.3%        | 2<br>3.0%   | 23.1% | 0.009  |                   |
| rs1061170                                 | Y402H (CFH)           | T        | C        | 20<br>17.9%     | 56<br>50.0% | 36<br>32.1% | 57.1% | 27<br>40.3% | 32<br>47.8%        | 8<br>11.9%  | 35.8% | <0.001 |                   |
| rs1048663                                 | IVS 9 (CFH)           | G        | A        | 78<br>69.6%     | 32<br>28.6% | 2<br>1.8%   | 16.1% | 47<br>70.1% | 16<br>23.9%        | 4<br>6.0%   | 17.9% | 0.66   |                   |
| rs2274700                                 | A473A (CFH)           | G        | A        | 71<br>63.3%     | 35<br>31.2% | 6<br>5.4%   | 16.5% | 21<br>31.3% | 36<br>53.7%        | 10<br>14.9% | 41.8% | <0.001 |                   |
| rs412852                                  | IVS 15 (CFH)          | A        | G        | 16<br>14.3%     | 53<br>47.3% | 43<br>38.4% | 62.1% | 23<br>34.3% | 34<br>50.7%        | 10<br>14.9% | 40.3% | <0.001 |                   |
| rs11582939                                | IVS 18 (CFH)          | C        | T        | 75<br>67.0%     | 35<br>31.2% | 2<br>1.8%   | 17.4% | 46<br>68.7% | 17<br>25.4%        | 4<br>6.0%   | 18.7% | 0.76   |                   |
| <b>BF-C2 gene</b>                         |                       |          |          |                 |             |             |       |             |                    |             |       |        |                   |
| rs9332739                                 | E318D (C2)            | G        | C        | 105<br>93.8%    | 7<br>6.3%   | 0<br>0.0%   | 3.1%  | 62<br>92.5% | 5<br>7.5%          | 0<br>0.0%   | 3.7%  | 0.75   |                   |
| rs547154                                  | IVS 10 (C2)           | G        | T        | 106<br>94.6%    | 6<br>5.4%   | 0<br>0.0%   | 2.7%  | 57<br>85.1% | 10<br>14.9%        | 0<br>0.0%   | 7.5%  | 0.03   |                   |
| rs4151667                                 | L9H (CFB)             | T        | A        | 105<br>93.8%    | 7<br>6.3%   | 0<br>0.0%   | 3.1%  | 62<br>92.5% | 5<br>7.5%          | 0<br>0.0%   | 3.7%  | 0.75   |                   |
| rs12614                                   | R32W (CFB)            | C        | T        | 88<br>78.6%     | 23<br>20.5% | 1<br>0.9%   | 11.2% | 60<br>89.6% | 7<br>10.4%         | 0<br>0.0%   | 5.2%  | 0.05   |                   |
| rs641153                                  | R32Q (CFB)            | G        | A        | 106<br>94.6%    | 6<br>5.4%   | 0<br>0.0%   | 2.7%  | 57<br>85.1% | 10<br>14.9%        | 0<br>0.0%   | 7.5%  | 0.03   |                   |
| <b>C3 gene</b>                            |                       |          |          |                 |             |             |       |             |                    |             |       |        |                   |
| rs2230199                                 | R102G (C3)            | G        | C        | 68<br>60.7%     | 35<br>31.2% | 9<br>8.0%   | 23.7% | 50<br>74.6% | 16<br>23.9%        | 1<br>1.5%   | 13.4% | 0.03   |                   |

\* MAF, minor allele frequency; \*\* ATT, Armitage's trend test
