# Supplementary material for: Systemic Complement Activation in Age-Related Macular Degeneration
Source: PLOS journal article supplement (doi:10.1371/journal.pone.0002593), 2008-07-01
Supplement: S2 (10.1371/journal.pone.0002593.s002) [file journal.pone.0002593.s002]

**SUPPLEMENTARY TABLE 2.**

**HAPLOTYPES AND THEIR FREQUENCIES IN THE CASE AND CONTROL POPULATION ESTIMATED BY FAMHAP.**

| Haplotype          | Frequency       |                   |
|--------------------|-----------------|-------------------|
|                    | Cases (n = 112) | Controls (n = 67) |
| <b>CFH gene</b>    |                 |                   |
| A T G A A C        | 12.0%           | 23.1%             |
| <b>G C G G G C</b> | 56.7%           | 35.8%             |
| G T A G A T        | 16.1%           | 17.9%             |
| G T G A A C        | 8.1%            | 17.9%             |
| G T G G G C        | 4.5%            | 4.5%              |
| others             | 2.7%            | 0.7%              |
| <b>BF-C2 gene</b>  |                 |                   |
| C G A C G          | 2.8%            | 2.4%              |
| C T A C A          | 0.0%            | 1.3%              |
| G G T C G          | 83.4%           | 85.3%             |
| <b>G G T T G</b>   | 11.2%           | 4.8%              |
| G T T C A          | 2.3%            | 5.7%              |
| others             | 0.4%            | 0.4%              |
