# Supplementary material for: Systemic Complement Activation in Age-Related Macular Degeneration
Source: PLOS journal article supplement (doi:10.1371/journal.pone.0002593), 2008-07-01
Supplement: S3 (10.1371/journal.pone.0002593.s003) [file journal.pone.0002593.s003]

| SUPPL.<br>TABLE 1.<br>GENOTYPES<br>Marker | Designation<br>(Gene) | Allele 1 | Allele 2 | Genotypes Cases |             |             |       | Genotypes Controls |             |             |       | ATT **  |
|-------------------------------------------|-----------------------|----------|----------|-----------------|-------------|-------------|-------|--------------------|-------------|-------------|-------|---------|
|                                           |                       |          |          | 11              | 12          | 22          | MAF * | 11                 | 12          | 22          | MAF*  | P value |
| CFH gene                                  |                       |          |          |                 |             |             |       |                    |             |             |       |         |
| rs800292                                  | I62V (CFH)            | G        | A        | 84<br>75.0%     | 27<br>24.1% | 1<br>8.9%   | 12.9% | 38<br>56.7%        | 27<br>40.3% | 2<br>3.0%   | 23.1% | 0.009   |
| rs1061170                                 | Y402H (CFH)           | T        | C        | 20<br>17.9%     | 56<br>50.0% | 36<br>32.1% | 57.1% | 27<br>40.3%        | 32<br>47.8% | 8<br>11.9%  | 35.8% | <0.001  |
| rs1048663                                 | IVS 9 (CFH)           | G        | A        | 78<br>69.6%     | 32<br>28.6% | 2<br>1.8%   | 16.1% | 47<br>70.1%        | 16<br>23.9% | 4<br>6.0%   | 17.9% | 0.66    |
| rs2274700                                 | A473A (CFH)           | G        | A        | 71<br>63.3%     | 35<br>31.2% | 6<br>5.4%   | 16.5% | 21<br>31.3%        | 36<br>53.7% | 10<br>14.9% | 41.8% | <0.001  |
| rs412852                                  | IVS 15 (CFH)          | A        | G        | 16<br>14.3%     | 53<br>47.3% | 43<br>38.4% | 62.1% | 23<br>34.3%        | 34<br>50.7% | 10<br>14.9% | 40.3% | <0.001  |
| rs11582939                                | IVS 18 (CFH)          | C        | T        | 75<br>67.0%     | 35<br>31.2% | 2<br>1.8%   | 17.4% | 46<br>68.7%        | 17<br>25.4% | 4<br>6.0%   | 18.7% | 0.76    |
| BF-C2 gene                                |                       |          |          |                 |             |             |       |                    |             |             |       |         |
| rs9332739                                 | E318D (C2)            | G        | C        | 105<br>93.8%    | 7<br>6.3%   | 0<br>0.0%   | 3.1%  | 62<br>92.5%        | 5<br>7.5%   | 0<br>0.0%   | 3.7%  | 0.75    |
| rs547154                                  | IVS 10 (C2)           | G        | T        | 106<br>94.6%    | 6<br>5.4%   | 0<br>0.0%   | 2.7%  | 57<br>85.1%        | 10<br>14.9% | 0<br>0.0%   | 7.5%  | 0.03    |
| rs4151667                                 | L9H (CFB)             | T        | A        | 105<br>93.8%    | 7<br>6.3%   | 0<br>0.0%   | 3.1%  | 62<br>92.5%        | 5<br>7.5%   | 0<br>0.0%   | 3.7%  | 0.75    |
| rs12614                                   | R32W (CFB)            | C        | T        | 88<br>78.6%     | 23<br>20.5% | 1<br>0.9%   | 11.2% | 60<br>89.6%        | 7<br>10.4%  | 0<br>0.0%   | 5.2%  | 0.05    |
| rs641153                                  | R32Q (CFB)            | G        | A        | 106<br>94.6%    | 6<br>5.4%   | 0<br>0.0%   | 2.7%  | 57<br>85.1%        | 10<br>14.9% | 0<br>0.0%   | 7.5%  | 0.03    |
| C3 gene                                   |                       |          |          |                 |             |             |       |                    |             |             |       |         |
| rs2230199                                 | R102G (C3)            | G        | C        | 68<br>60.7%     | 35<br>31.2% | 9<br>8.0%   | 23.7% | 50<br>74.6%        | 16<br>23.9% | 1<br>1.5%   | 13.4% | 0.03    |

\* MAF, minor allele frequency; \*\* ATT, Armitage's trend test

**SUPPLEMENTARY TABLE 2.**

**HAPLOTYPES AND THEIR FREQUENCIES IN THE CASE AND CONTROL POPULATION ESTIMATED BY FAMHAP.**

| Haplotype          | Frequency       |                   |
|--------------------|-----------------|-------------------|
|                    | Cases (n = 112) | Controls (n = 67) |
| <b>CFH gene</b>    |                 |                   |
| A T G A A C        | 12.0%           | 23.1%             |
| <b>G C G G G C</b> | 56.7%           | 35.8%             |
| G T A G A T        | 16.1%           | 17.9%             |
| G T G A A C        | 8.1%            | 17.9%             |
| G T G G G C        | 4.5%            | 4.5%              |
| others             | 2.7%            | 0.7%              |
| <b>BF-C2 gene</b>  |                 |                   |
| C G A C G          | 2.8%            | 2.4%              |
| C T A C A          | 0.0%            | 1.3%              |
| G G T C G          | 83.4%           | 85.3%             |
| <b>G G T T G</b>   | 11.2%           | 4.8%              |
| G T T C A          | 2.3%            | 5.7%              |
| others             | 0.4%            | 0.4%              |

**Supplementary Table 3: Retrospective Power Analysis**

| Marker             | Designation (Gene) | Risk Allele Frequency | Heterozygotes Relative Risk | Homozygotes Relative Risk | Power |
|--------------------|--------------------|-----------------------|-----------------------------|---------------------------|-------|
| <b>CFH gene</b>    |                    |                       |                             |                           |       |
| rs800292           | I62V (CFH)         | 0.769                 | 2.00                        | 4.42                      | 0.942 |
| rs1061170          | Y402H (CFH)        | 0.358                 | 2.36                        | 6.08                      | 0.999 |
| rs1048663          | IVS 9 (CFH)        | 0.821                 | 4.00                        | 3.32                      | 0.050 |
| rs2274700          | A473A (CFH)        | 0.582                 | 1.62                        | 5.63                      | 0.999 |
| rs412852           | IVS 15 (CFH)       | 0.403                 | 2.24                        | 6.18                      | 0.999 |
| rs11582939         | IVS 18 (CFH)       | 0.813                 | 4.12                        | 3.26                      | 0.053 |
| <b>CFB-C2 gene</b> |                    |                       |                             |                           |       |
| rs9332739          | E318D (C2)         | 0.963                 | 1.21                        | 2.42 *                    | 0.264 |
| rs547154           | IVS 10 (C2)        | 0.925                 | 3.10                        | 6.20 *                    | 0.488 |
| rs4151667          | L9H (CFB)          | 0.963                 | 1.21                        | 2.42 *                    | 0.264 |
| rs12614            | R32W (CFB)         | 0.052                 | 2.24                        | 4.48 *                    | 0.716 |
| rs641153           | R32Q (CFB)         | 0.925                 | 3.10                        | 6.20 *                    | 0.488 |
| <b>C3 gene</b>     |                    |                       |                             |                           |       |
| rs2230199          | R102G (C3)         | 0.134                 | 1.61                        | 6.62                      | 0.723 |

\* Because the homozygous risk genotype was not observed, the homozygous relative risk could not be calculated, and was therefore estimated as two times the risk of the heterozygotes.

The power calculations were performed for a two-sided level of  $\alpha = 0.05$  and based on the prevalence of AMD according to van Leeuwen R, Klaver CC, Vingerling JR, Hofman A, de Jong PT (2003) Epidemiology of age-related maculopathy: a review. Eur J Epidemiol 18: 845-854.
